# Supplementary material for: A Study of Concept to Prepare Totally Biosourced Wood Adhesives from Only Soy Protein and Tannin
Source: MDPI journal article supplement (doi:10.3390/polym14061150), 2022-03-13

## SUPPLEMENTARY MATERIAL

### A STUDY OF CONCEPT TO PREPARE TOTALLY BIO WOOD ADHESIVES FROM ONLY SOY PROTEIN AND TANNIN

Saman Ghahri <sup>1\*</sup>, Antonio Pizzi <sup>2\*</sup>, Reza Hajihassani <sup>1</sup>

**Table S1.** Assignments of molecular structures from MALDI ToF spectrometry for Soy Protein Isolate (SPI) and Quebracho tannin extract resin prepared at 80°C.

410 Da = fisetinidin-aspartic acid with Na<sup>+</sup>

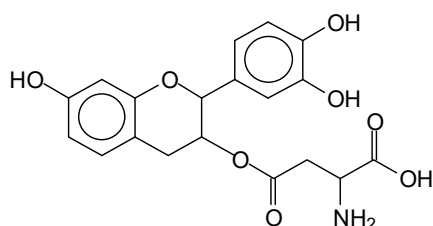

467 Da = robinetinidin-arginine, with Na<sup>+</sup>, calculated 469 Da.

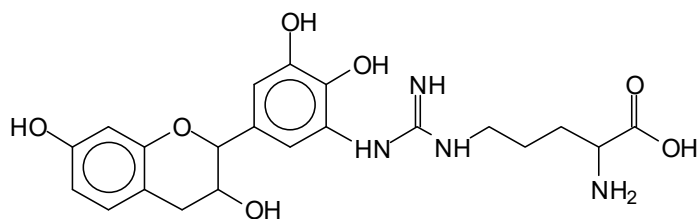

483 Da = delphinidin-arginine with Na<sup>+</sup> (calculated 485 Da)

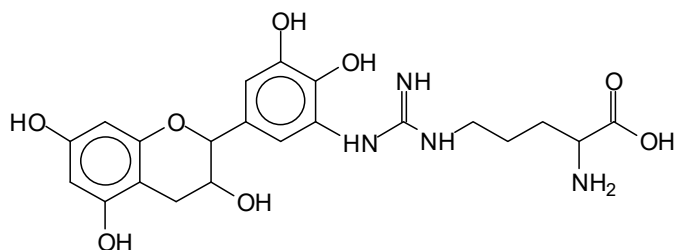

576 Da = aspartic acid-delphinidin-arginine, no Na<sup>+</sup>, and 600 Da with Na<sup>+</sup>

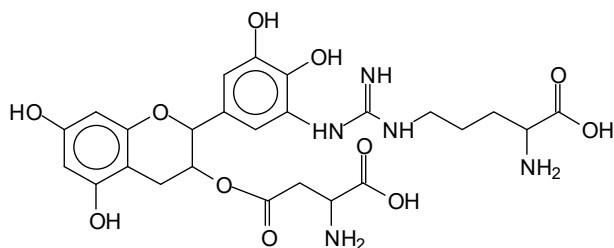

614-616 Da = tyrosine-delphinidin-phenylalanine no Na<sup>+</sup>, calculated 616

640-642 Da = tyrosine-delphinidin-phenylalanine with Na<sup>+</sup>, calculated 640 Da

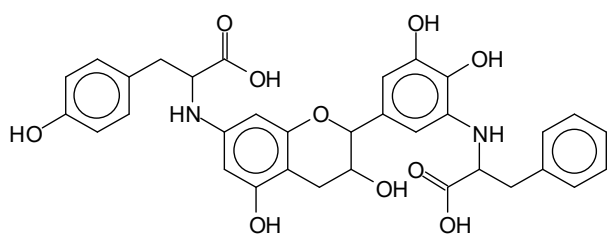

688 Da = no Na<sup>+</sup>, calculated 688.7 Da., robinetinidin-arginin-leucin-aspartic acid

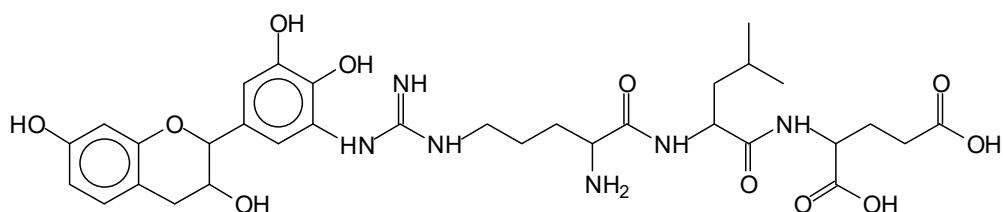

889 Da = no Na<sup>+</sup>, calculated 890 Da, galocatechin-arginine-leucin-aspartic acid-glycin-glutamic acid

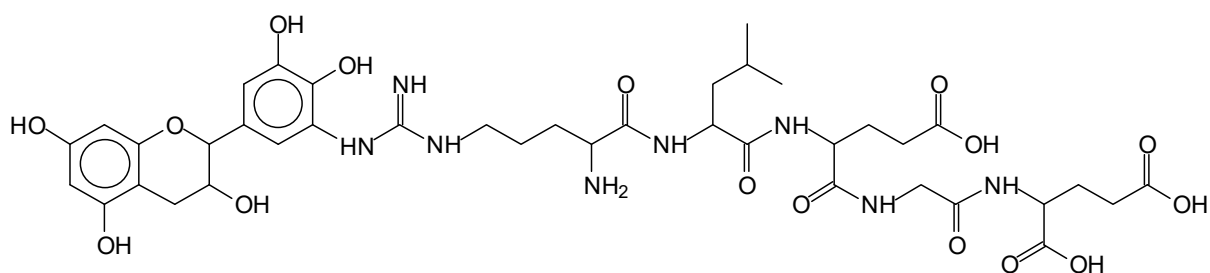

1128-1130 Da = no Na<sup>+</sup>, fisetinidin dimer-arginine-leucin-aspartic acid-glycin-glutamic acid

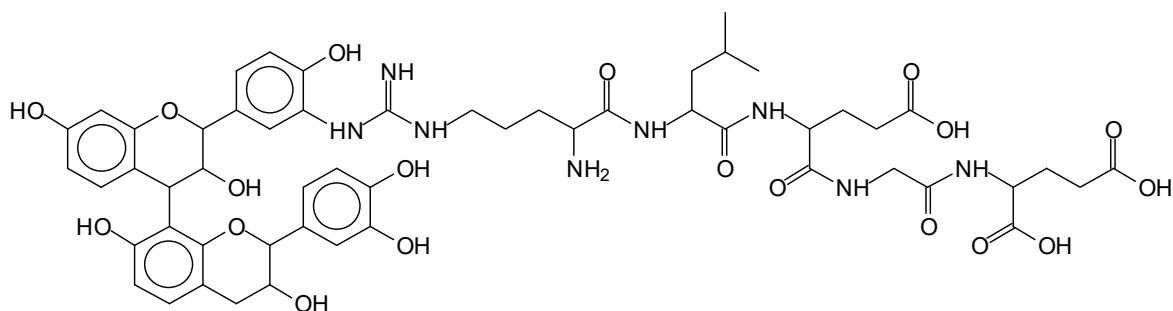

**OR**

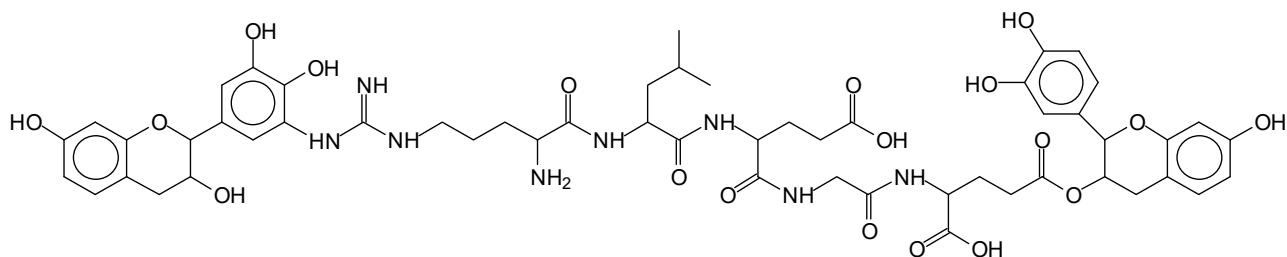

1146 Da = no Na<sup>+</sup>, catechin-fisetinidin-arginine-leucin-aspartic acid-glycin-glutamic acid

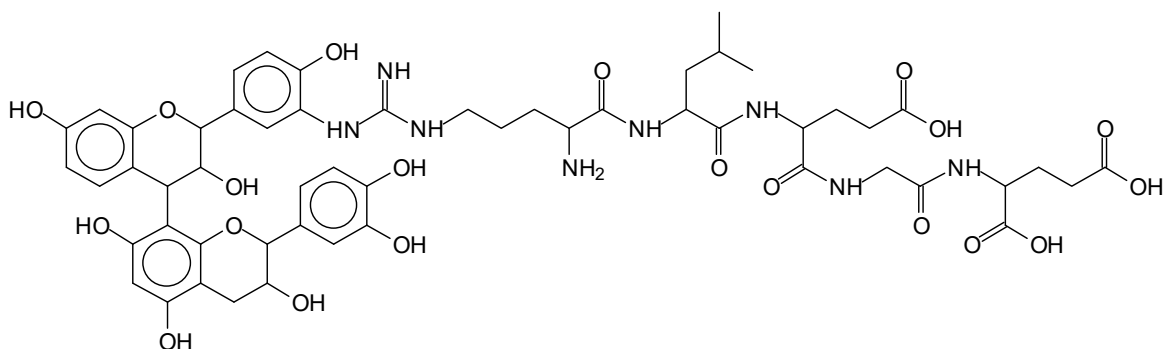

**OR**

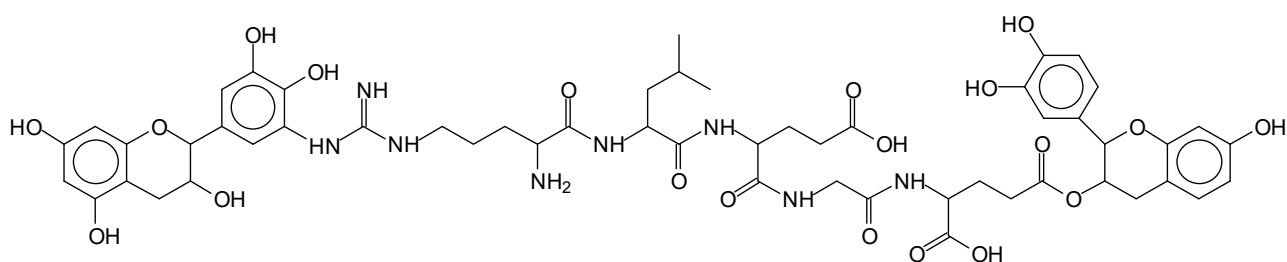

1161 Da = no Na<sup>+</sup>, calc. 1162 Da, catechin-robinetidin-arginine-leucin-aspartic acid-glycin-glutamic acid

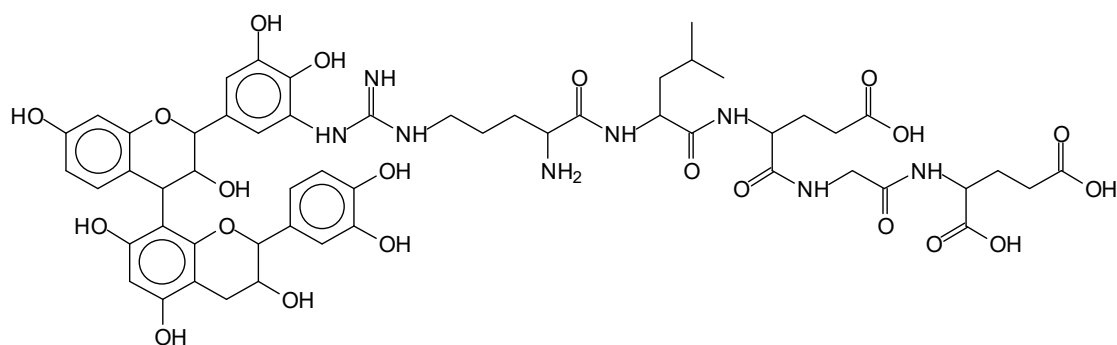

1177 Da = no Na<sup>+</sup>, calc. 1178 Da, delphinidin-robinetidin-arginine-leucin-aspartic acid-glycin-glutamic acid

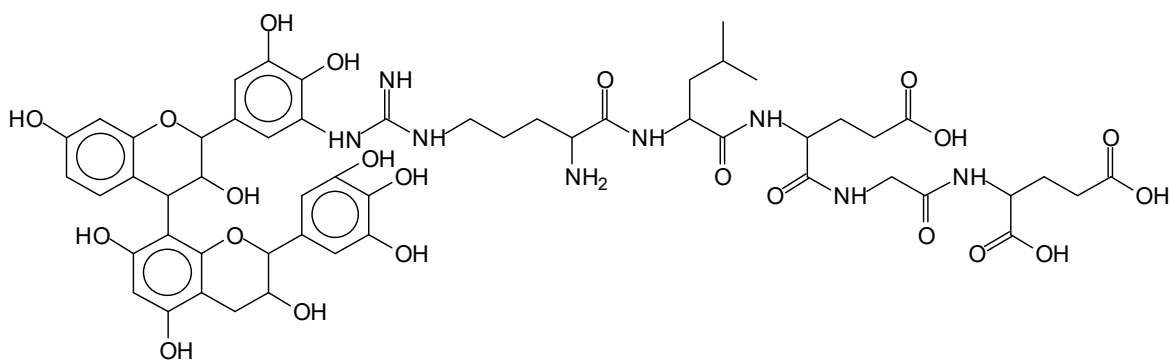

1194 Da = no Na<sup>+</sup>; calc. 1194 Da, delphinidin dimer-arginine-leucin-aspartic acid-glycin-glutamic acid

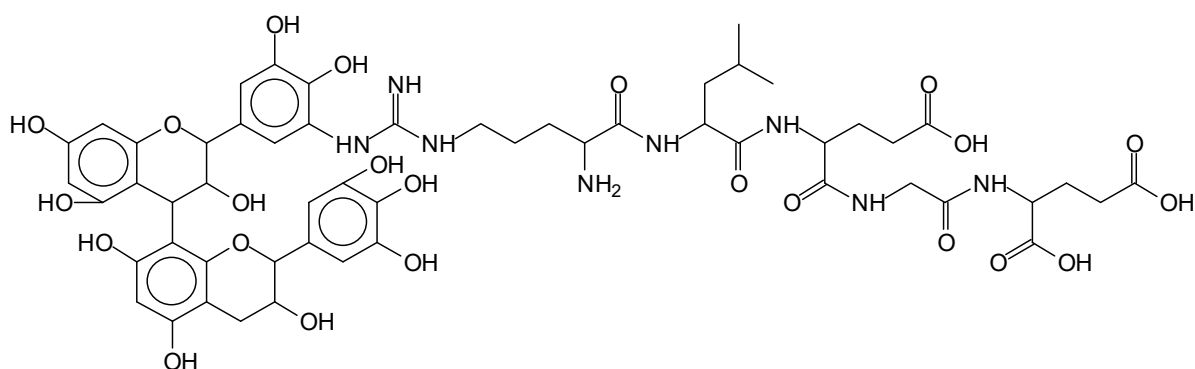

1465 Da = no Na<sup>+</sup>, glutamic acid-glycine-aspartic acid-robinatenidin-catechin--arginine-leucin-aspartic acid-glycin-glutamic acid

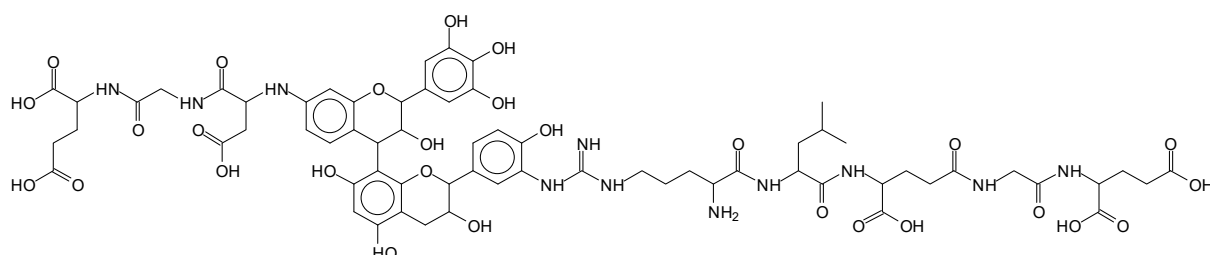

1481 Da = no Na<sup>+</sup>, glutamic acid-glycine-aspartic acid-robinatenidin-gallocatechin--arginine-leucin-aspartic acid-glycin-glutammic acid

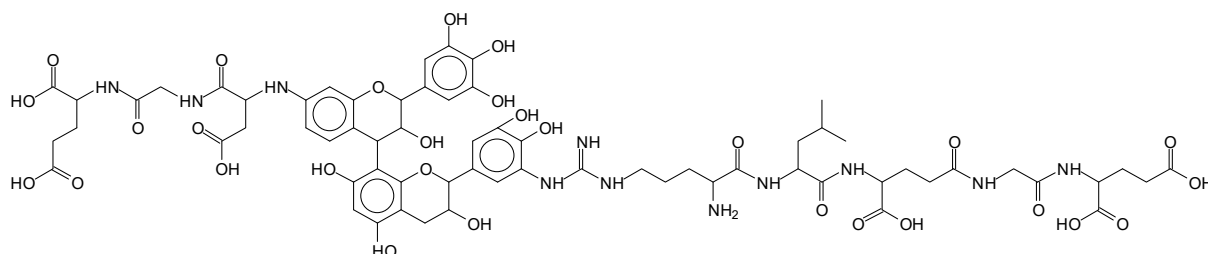

1497 Da = no Na<sup>+</sup>, glutamic acid-glycine-aspartic acid-gallocatechin dimer-arginine-leucin-aspartic acid-glycin-glutammic acid

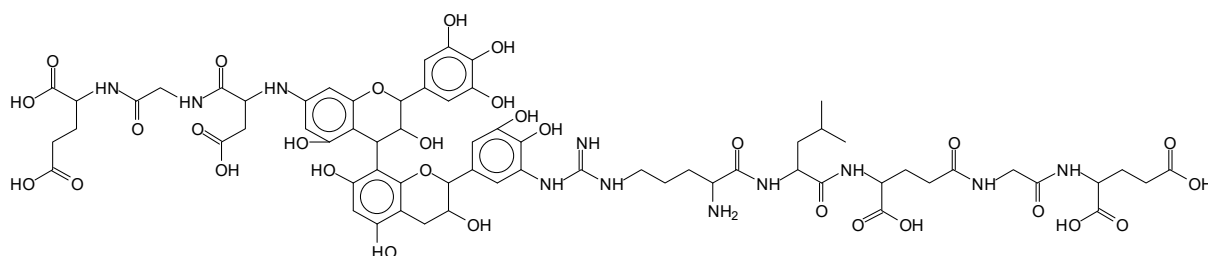

Supplement: s1 [file s1]
